# Supplementary material
Source: PubMed Central journal article supplement (PMC9343280)
Supplement: 787_2021_1739_MOESM3_ESM.pdf [file 787_2021_1739_MOESM3_ESM.pdf]

Article title: Families in the COVID-19 Pandemic: Parental Stress, Parent Mental Health and the Occurrence of Adverse Childhood Experiences: Results of a Representative Survey in Germany

Journal: European Child & Adolescent Psychiatry

Authors: Claudia Calvano PhD<sup>1</sup>, Lara Engelke MSc<sup>2</sup>, Jessica Di Bella PhD<sup>1</sup>, Jana Kindermann MSc<sup>1</sup>, Babette Renneberg PhD<sup>2\*</sup>, & Sibylle M. Winter MD<sup>1\*</sup>  
\*shared senior authors

Affiliations: <sup>1</sup> Charité - Universitätsmedizin Berlin, Corporate Member of Freie Universität Berlin, Humboldt-Universität zu Berlin, Berlin Institute of Health (BIH)  
Department of Child and Adolescent Psychiatry, Psychosomatics and Psychotherapy  
<sup>2</sup> Freie Universitaet of Berlin, Department of Clinical Psychology and Psychotherapy

**Corresponding author:** Claudia Calvano, PhD, Email: [claudia.calvano@charite.de](mailto:claudia.calvano@charite.de)

**Table S3**

**Bivariate correlations between the specific areas of pandemic-related stress and the outcomes on parent level**

|      | overall<br>burden | childcare<br>closures | school<br>closures | home-<br>work<br>online | work-<br>place<br>closures | home<br>office | maintain<br>daily<br>structure | social<br>distancing | restrict.<br>outside<br>activ. | worries<br>own<br>health | worries<br>others'<br>health | restrict<br>medical<br>treatment | restrict<br>psychoth.<br>treatment | restrict<br>child<br>services |
|------|-------------------|-----------------------|--------------------|-------------------------|----------------------------|----------------|--------------------------------|----------------------|--------------------------------|--------------------------|------------------------------|----------------------------------|------------------------------------|-------------------------------|
| PS   | .229***           | .235***               | .284***            | .338***                 | .138*                      | .251***        | .314***                        | .104**               | .153***                        | .162***                  | .090**                       | .177***                          | .289***                            | .393***                       |
| GS   | .300***           | .089*                 | .290***            | .317***                 | .261***                    | .292***        | .362***                        | .247***              | .232***                        | .323***                  | .299***                      | .297***                          | .339***                            | .298***                       |
| SH   | -.137***          | .002                  | -.150***           | -.191***                | -.102                      | -.199***       | -.153***                       | -.077*               | -.097**                        | -.293***                 | -.201***                     | -.236***                         | -.273***                           | -.265***                      |
| ANX  | .240***           | .107*                 | .205***            | .182**                  | .236***                    | .136**         | .185***                        | .187***              | .158***                        | .283***                  | .263***                      | .240***                          | .288***                            | .302***                       |
| DEPR | .244***           | .134**                | .206***            | .203***                 | .113*                      | .141**         | .258***                        | .191***              | .185***                        | .220***                  | .213***                      | .196***                          | .246***                            | .223***                       |

*Notes.* PS = Parental stress; GS = general stress; SH = subjective health rating; ANX= anxiety; DEPR = Depression; for the subjective health rating, higher scores indicate better health, for the other outcomes, higher scores indicate higher burden, stress and symptoms; all parental outcomes with respect to the time of the subjectively highest burden; \*  $p < .05$ . \*\*  $p < .01$ . \*\*\*  $p < .001$ .
